# Supplementary material
Source: ML conference proceedings conference paper supplement (https://proceedings.mlr.press/v70/wang17f.html)
Supplement: Supplementary file [file wang17f-supp.pdf]

## A. Illustrative Examples of General Sparse Learning Problems

In this section we discuss additional examples of high-dimensional statistical learning problems for which Theorem 6 is applicable.

### A.1. Sparse Logistic Regression

For logistic model, performing maximum likelihood estimation (MLE) on (12) leads to the logistic loss function  $\ell(y_{ji}, \langle \beta, \mathbf{x}_{ji} \rangle) = \log(1 + \exp(-y_{ji} \langle \beta, \mathbf{x}_{ji} \rangle))$ . For high-dimensional problems, when we add a  $\ell_1$  regularization, we obtain the  $\ell_1$  regularized logistic regression model (Zhu & Hastie, 2004, Wu et al., 2009):

$$\hat{\beta}_{\text{centralize}} = \arg \min_{\beta} \frac{1}{mn} \sum_{j \in [m]} \sum_{i \in [n]} \log(1 + \exp(-y_{ji} \langle \beta, \mathbf{x}_{ji} \rangle)) + \lambda \|\beta\|_1.$$

The logistic loss is  $\frac{1}{4}$ -smooth, and we also know  $M = \frac{1}{4}$  because of self-concordance (Zhang & Xiao, 2015). Let  $\mathcal{L}_j(\beta) = \frac{1}{n} \sum_{i \in [n]} \log(1 + \exp(-y_{ji} \langle \beta, \mathbf{x}_{ji} \rangle))$ , (Negahban et al., 2012) showed that if  $\mathbf{x}_{ji}$  are drawn from mean zero distribution with sub-Gaussian tails, then  $\mathcal{L}_1(\beta)$  satisfies the restricted strong condition (5). Moreover, we have the following control on the quantity  $\left\| \frac{1}{m} \sum_{j \in [m]} \nabla \mathcal{L}_j(\beta^*) \right\|_{\infty}$ .

**Lemma 10.** *Then we have the following upper bound holds in probability at least  $1 - \delta$ :*

$$\left\| \frac{1}{m} \sum_{j \in [m]} \nabla \mathcal{L}_j(\beta^*) \right\|_{\infty} \lesssim \|\mathbf{x}_{ji}\|_{\infty} \sqrt{\frac{2 \log(p/\delta)}{mn}}.$$

The following  $\ell_1$  error bound states the estimation error for logistic regression with  $\ell_1$  regularization, which was established, for example, in (van de Geer, 2008, Negahban et al., 2012).

**Lemma 11.** *Under the model (12), when  $n \geq (64/\kappa)s \log p$ , we have the following estimation error bound for  $\hat{\beta}_0$  holds with probability at least  $1 - \delta$ :*

$$\|\hat{\beta}_0 - \beta^*\|_1 \lesssim \frac{s\sigma_X}{\kappa} \sqrt{\frac{2 \log(np/\delta)}{n}}.$$

With above analysis for sparse logistic regression model with random design, we are ready to present the results for the estimation error bound which established local exponential convergence.

**Corollary 12.** *Under sparse logistic regression model with random design, and set  $\lambda_{t+1}$  as (9). If the following condition holds for some  $T \geq 0$ :*

$$\|\hat{\beta}_T - \beta^*\|_1 \leq 4 \sqrt{\frac{\log(2p/\delta)}{n}}. \quad (13)$$

Then with probability at least  $1 - 2\delta$ , we have the following estimation error bound for all  $t \geq T$ :

$$\|\hat{\beta}_{t+1} - \beta^*\|_1 \leq \frac{1 - a_n^{t-T+1}}{1 - a_n} \frac{96s\sigma_X}{\kappa} \sqrt{\frac{\log(p/\delta)}{mn}} + 4a_n^{t-T+1} \sqrt{\frac{\log(2p/\delta)}{n}}, \quad (14)$$

$$\|\hat{\beta}_{t+1} - \beta^*\|_2 \leq \frac{1 - a_n^{t-T+1}}{1 - a_n} \frac{4\sqrt{s}\sigma_X}{\kappa} \sqrt{\frac{\log(p/\delta)}{mn}} + 4a_n^{t-T} b_n \sqrt{\frac{\log(2p/\delta)}{n}}, \quad (15)$$

where

$$a_n = \frac{24s\sigma_X}{\kappa} \sqrt{\frac{\log(2p/\delta)}{n}} \quad \text{and} \quad b_n = \frac{\sqrt{s}\sigma_X}{\kappa} \sqrt{\frac{\log(np/\delta)}{n}}.$$

### A.2. High-dimensional Generalized Linear Models

The results are readily extendable to other high-dimensional generalized linear models (McCullagh & Nelder, 1989, van de Geer, 2008), where the response variable  $y_{ji} \in \mathcal{Y}$  is drawn from the distribution

$$\mathbb{P}(y_{ji} | \mathbf{x}_{ji}) \propto \exp\left(\frac{y_{ji} \langle \mathbf{x}_{ji}, \beta^* \rangle - \Phi(\langle \mathbf{x}_{ji}, \beta^* \rangle)}{A(\sigma)}\right),$$

where  $\Phi(\cdot)$  is a link function and  $A(\sigma)$  is a scale parameter. Under the random subgaussian design, as long as the loss function has Lipschitz gradient, then the algorithm and corresponding estimation error bound can be applied.

### A.3. High-dimensional Graphical Models

The results can also be used for the distributed unsupervised learning setting where the task is to learn a sparse graphical structure that represents the conditional independence between variables. Widely studied graphical models are Gaussian graphical models (Meinshausen & Bühlmann, 2006, Yuan & Lin, 2007) for continuous data and Ising graphical models (Ravikumar et al., 2010) for binary observations. As shown in (Meinshausen & Bühlmann, 2006, Ravikumar et al., 2010), these model selection problems can be reduced to solving parallel  $\ell_1$  regularized linear regression and logistic regression problems, respectively. Thus the approach presented in this paper can be readily applicable for these tasks.

## B. Proofs

The section contains proofs of some theorems and lemmas stated in the main paper.

### B.1. Proof of Lemma 8

*Proof.* Recall the definition of  $\tilde{\mathcal{L}}_1$  from (11). We have

$$\begin{aligned} \nabla \tilde{\mathcal{L}}_1(\boldsymbol{\beta}^*, \hat{\boldsymbol{\beta}}_t) &= \nabla \mathcal{L}_1(\boldsymbol{\beta}^*) + \frac{1}{m} \sum_{j \in [m]} \nabla \mathcal{L}_j(\hat{\boldsymbol{\beta}}_t) - \nabla \mathcal{L}_1(\hat{\boldsymbol{\beta}}_t) \\ &= \frac{1}{m} \sum_{j \in [m]} \nabla \mathcal{L}_j(\boldsymbol{\beta}^*) + \nabla \mathcal{L}_1(\boldsymbol{\beta}^*) - \nabla \mathcal{L}_1(\hat{\boldsymbol{\beta}}_t) - \left( \frac{1}{m} \sum_{j \in [m]} \nabla \mathcal{L}_j(\boldsymbol{\beta}^*) - \frac{1}{m} \sum_{j \in [m]} \nabla \mathcal{L}_j(\hat{\boldsymbol{\beta}}_t) \right). \end{aligned}$$

Using the triangle inequality

$$\begin{aligned} &\left\| \nabla \tilde{\mathcal{L}}_1(\boldsymbol{\beta}^*, \hat{\boldsymbol{\beta}}_t) \right\|_{\infty} \\ &\leq \left\| \frac{1}{m} \sum_{j \in [m]} \nabla \mathcal{L}_j(\boldsymbol{\beta}^*) \right\|_{\infty} + \left\| \nabla \mathcal{L}_1(\boldsymbol{\beta}^*) - \nabla \mathcal{L}_1(\hat{\boldsymbol{\beta}}_t) - \left( \frac{1}{m} \sum_{j \in [m]} \nabla \mathcal{L}_j(\boldsymbol{\beta}^*) - \frac{1}{m} \sum_{j \in [m]} \nabla \mathcal{L}_j(\hat{\boldsymbol{\beta}}_t) \right) \right\|_{\infty}. \end{aligned}$$

We focus on bounding the second term in the right-hand-side inequality above. Let  $\tau_{ji} = \ell'(y_{ji}, \langle \boldsymbol{\beta}^*, \mathbf{x}_{ji} \rangle)$  and define  $\mathbf{v}_{ji}(\hat{\boldsymbol{\beta}}_t) \in \mathbb{R}^p$ :

$$\begin{aligned} \mathbf{v}_{ji}(\hat{\boldsymbol{\beta}}_t) &= \mathbf{x}_{ji}(\ell'(y_{ji}, \langle \boldsymbol{\beta}^*, \mathbf{x}_{ji} \rangle) - \ell'(y_{ji}, \langle \hat{\boldsymbol{\beta}}_t, \mathbf{x}_{ji} \rangle)) \\ &= \tau_{ji} \mathbf{x}_{ji} \mathbf{x}_{ji}^T (\hat{\boldsymbol{\beta}}_t - \boldsymbol{\beta}^*) + \mathbf{x}_{ji} \frac{\ell'''(y_{ji}, \mathbf{u}_{ji})}{2} (\langle \hat{\boldsymbol{\beta}}_t - \boldsymbol{\beta}^*, \mathbf{x}_{ji} \rangle)^2 \end{aligned}$$

where  $\mathbf{u}_{ji}$  is a number between  $\langle \hat{\boldsymbol{\beta}}_t, \mathbf{x}_{ji} \rangle$  and  $\langle \boldsymbol{\beta}^*, \mathbf{x}_{ji} \rangle$ . With this notation

$$\begin{aligned} &\left\| \nabla \mathcal{L}_1(\boldsymbol{\beta}^*) - \nabla \mathcal{L}_1(\hat{\boldsymbol{\beta}}_t) - \left( \frac{1}{m} \sum_{j \in [m]} \nabla \mathcal{L}_j(\boldsymbol{\beta}^*) - \frac{1}{m} \sum_{j \in [m]} \nabla \mathcal{L}_j(\hat{\boldsymbol{\beta}}_t) \right) \right\|_{\infty} \\ &\leq \left\| \frac{1}{n} \sum_{i \in [n]} \mathbf{v}_{1i}(\hat{\boldsymbol{\beta}}_t) - \frac{1}{mn} \sum_j \sum_i \mathbf{v}_{ji}(\hat{\boldsymbol{\beta}}_t) \right\|_{\infty} \\ &\leq \left\| \frac{1}{n} \sum_i \tau_{1i} \mathbf{x}_{1i} \mathbf{x}_{1i}^T (\hat{\boldsymbol{\beta}}_t - \boldsymbol{\beta}^*) - \frac{1}{mn} \sum_j \sum_i \tau_{ji} \mathbf{x}_{ji} \mathbf{x}_{ji}^T (\hat{\boldsymbol{\beta}}_t - \boldsymbol{\beta}^*) \right\|_{\infty} + M \cdot \left( \max_{j,i} \|\mathbf{x}_{ji}\|_{\infty}^3 \right) \cdot \|\hat{\boldsymbol{\beta}}_t - \boldsymbol{\beta}^*\|_1^2. \end{aligned}$$

The first term above can be further upper bounded by

$$\begin{aligned}
 & \left\| \frac{1}{n} \sum_j \tau_{1i} \mathbf{x}_{1i} \mathbf{x}_{1i}^T (\hat{\boldsymbol{\beta}}_t - \boldsymbol{\beta}^*) - \frac{1}{mn} \sum_j \sum_i \tau_{ji} \mathbf{x}_{ji} \mathbf{x}_{ji}^T (\hat{\boldsymbol{\beta}}_t - \boldsymbol{\beta}^*) \right\|_{\infty} \\
 & \leq \left\| \frac{1}{n} \sum_j \tau_{1i} \mathbf{x}_{1i} \mathbf{x}_{1i}^T - \frac{1}{mn} \sum_j \sum_i \tau_{ji} \mathbf{x}_{ji} \mathbf{x}_{ji}^T \right\|_{\infty} \cdot \|\hat{\boldsymbol{\beta}}_t - \boldsymbol{\beta}^*\|_1. \\
 & \leq \left( \left\| \frac{1}{n} \sum_{i \in [n]} \tau_{1i} \mathbf{x}_{1i} \mathbf{x}_{1i}^T - \mathbb{E} [\tau_{ji} \mathbf{x}_{ji} \mathbf{x}_{ji}^T] \right\|_{\infty} + \left\| \frac{1}{mn} \sum_j \sum_i \tau_{ji} \mathbf{x}_{ji} \mathbf{x}_{ji}^T - \mathbb{E} [\tau_{ji} \mathbf{x}_{ji} \mathbf{x}_{ji}^T] \right\|_{\infty} \right) \cdot \|\hat{\boldsymbol{\beta}}_t - \boldsymbol{\beta}^*\|_1.
 \end{aligned}$$

Using Hoeffding's inequality together with a union bound, we have with probability at least  $1 - \delta$ ,

$$\left\| \frac{1}{n} \sum_{i \in [n]} \tau_{1i} \mathbf{x}_{1i} \mathbf{x}_{1i}^T - \mathbb{E} [\tau_{ji} \mathbf{x}_{ji} \mathbf{x}_{ji}^T] \right\|_{\infty} \leq L \left( \max_{j,i} \|\mathbf{x}_{ji}\|_{\infty}^2 \right) \sqrt{\frac{2 \log(2p/\delta)}{n}},$$

and

$$\left\| \frac{1}{mn} \sum_j \sum_i \tau_{ji} \mathbf{x}_{ji} \mathbf{x}_{ji}^T - \mathbb{E} [\tau_{ji} \mathbf{x}_{ji} \mathbf{x}_{ji}^T] \right\|_{\infty} \leq L \left( \max_{j,i} \|\mathbf{x}_{ji}\|_{\infty}^2 \right) \sqrt{\frac{2 \log(2p/\delta)}{mn}}.$$

Combining the bounds, the proof of the lemma is complete.  $\square$

## B.2. Proof of Lemma 9

*Proof.* The proof uses ideas presented in (Negahban et al., 2012). By triangle inequality we have

$$\begin{aligned}
 \|\hat{\boldsymbol{\beta}}_{t+1}\|_1 - \|\boldsymbol{\beta}^*\|_1 &= \|\boldsymbol{\beta}^* + (\hat{\boldsymbol{\beta}}_{t+1} - \boldsymbol{\beta}^*)_{S^c} + (\hat{\boldsymbol{\beta}}_{t+1} - \boldsymbol{\beta}^*)_S\|_1 - \|\boldsymbol{\beta}^*\|_1 \\
 &\geq \|\boldsymbol{\beta}^* + (\hat{\boldsymbol{\beta}}_{t+1} - \boldsymbol{\beta}^*)_{S^c}\|_1 - \|(\hat{\boldsymbol{\beta}}_{t+1} - \boldsymbol{\beta}^*)_S\|_1 - \|\boldsymbol{\beta}^*\|_1 \\
 &= \|(\hat{\boldsymbol{\beta}}_{t+1} - \boldsymbol{\beta}^*)_{S^c}\|_1 - \|(\hat{\boldsymbol{\beta}}_{t+1} - \boldsymbol{\beta}^*)_S\|_1.
 \end{aligned}$$

By the optimality of  $\hat{\boldsymbol{\beta}}_{t+1}$  for (4), we have

$$\tilde{\mathcal{L}}_1(\hat{\boldsymbol{\beta}}_{t+1}, \hat{\boldsymbol{\beta}}_t) + \lambda_{t+1} \|\hat{\boldsymbol{\beta}}_{t+1}\|_1 - \tilde{\mathcal{L}}_1(\boldsymbol{\beta}^*, \hat{\boldsymbol{\beta}}_t) - \lambda_{t+1} \|\boldsymbol{\beta}^*\|_1 \leq 0.$$

Thus

$$\tilde{\mathcal{L}}_1(\hat{\boldsymbol{\beta}}_{t+1}, \hat{\boldsymbol{\beta}}_t) - \tilde{\mathcal{L}}_1(\boldsymbol{\beta}^*, \hat{\boldsymbol{\beta}}_t) + \lambda_{t+1} (\|(\hat{\boldsymbol{\beta}}_{t+1} - \boldsymbol{\beta}^*)_{S^c}\|_1 - \|(\hat{\boldsymbol{\beta}}_{t+1} - \boldsymbol{\beta}^*)_S\|_1) \leq 0.$$

By the convexity of  $\tilde{\mathcal{L}}_1(\cdot, \hat{\boldsymbol{\beta}}_t)$ , we further have

$$\tilde{\mathcal{L}}_1(\hat{\boldsymbol{\beta}}_{t+1}, \hat{\boldsymbol{\beta}}_t) - \tilde{\mathcal{L}}_1(\boldsymbol{\beta}^*, \hat{\boldsymbol{\beta}}_t) \geq \langle \nabla \tilde{\mathcal{L}}_1(\boldsymbol{\beta}^*, \hat{\boldsymbol{\beta}}_t), \hat{\boldsymbol{\beta}}_{t+1} - \boldsymbol{\beta}^* \rangle.$$

Thus by Hölder's inequality

$$\begin{aligned}
 0 &\geq \langle \nabla \tilde{\mathcal{L}}_1(\boldsymbol{\beta}^*, \hat{\boldsymbol{\beta}}_t), \hat{\boldsymbol{\beta}}_{t+1} - \boldsymbol{\beta}^* \rangle + \lambda_{t+1} (\|(\hat{\boldsymbol{\beta}}_{t+1} - \boldsymbol{\beta}^*)_{S^c}\|_1 - \|(\hat{\boldsymbol{\beta}}_{t+1} - \boldsymbol{\beta}^*)_S\|_1) \\
 &\geq -\|\nabla \tilde{\mathcal{L}}_1(\boldsymbol{\beta}^*, \hat{\boldsymbol{\beta}}_t)\|_{\infty} \|\hat{\boldsymbol{\beta}}_{t+1} - \boldsymbol{\beta}^*\|_1 + \lambda_{t+1} (\|(\hat{\boldsymbol{\beta}}_{t+1} - \boldsymbol{\beta}^*)_{S^c}\|_1 - \|(\hat{\boldsymbol{\beta}}_{t+1} - \boldsymbol{\beta}^*)_S\|_1).
 \end{aligned}$$

Under the assumption on  $\lambda_{t+1}$  we further have

$$\begin{aligned}
 0 &\geq -\frac{\lambda_{t+1}}{2} \|\hat{\boldsymbol{\beta}}_{t+1} - \boldsymbol{\beta}^*\|_1 + \lambda_{t+1} (\|(\hat{\boldsymbol{\beta}}_{t+1} - \boldsymbol{\beta}^*)_{S^c}\|_1 - \|(\hat{\boldsymbol{\beta}}_{t+1} - \boldsymbol{\beta}^*)_S\|_1) \\
 &= \frac{\lambda_{t+1}}{2} \|(\hat{\boldsymbol{\beta}}_{t+1} - \boldsymbol{\beta}^*)_{S^c}\|_1 - \frac{3\lambda_{t+1}}{2} \|(\hat{\boldsymbol{\beta}}_{t+1} - \boldsymbol{\beta}^*)_S\|_1,
 \end{aligned}$$

which completes the proof.  $\square$

**B.3. Proof of Theorem 6**

*Proof.* For the term  $\tilde{\mathcal{L}}_1(\hat{\beta}_{t+1}, \hat{\beta}_t) - \tilde{\mathcal{L}}_1(\beta^*, \hat{\beta}_t)$  we have

$$\begin{aligned}
 \tilde{\mathcal{L}}_1(\hat{\beta}_{t+1}, \hat{\beta}_t) - \tilde{\mathcal{L}}_1(\beta^*, \hat{\beta}_t) &= \mathcal{L}_1(\hat{\beta}_{t+1}) + \left\langle \frac{1}{m} \sum_{j \in [m]} \nabla \mathcal{L}_j(\hat{\beta}_t) - \nabla \mathcal{L}_1(\hat{\beta}_t), \hat{\beta}_{t+1} \right\rangle \\
 &\quad - \mathcal{L}_1(\beta^*) - \left\langle \frac{1}{m} \sum_{j \in [m]} \nabla \mathcal{L}_j(\hat{\beta}_t) - \nabla \mathcal{L}_1(\hat{\beta}_t), \beta^* \right\rangle \\
 &\geq \langle \nabla \mathcal{L}_1(\beta^*), \hat{\beta}_{t+1} - \beta^* \rangle + \kappa \|\hat{\beta}_{t+1} - \beta^*\|_2^2 \\
 &\quad + \left\langle \frac{1}{m} \sum_{j \in [m]} \nabla \mathcal{L}_j(\hat{\beta}_t) - \nabla \mathcal{L}_1(\hat{\beta}_t), \hat{\beta}_{t+1} \right\rangle \\
 &\quad - \left\langle \frac{1}{m} \sum_{j \in [m]} \nabla \mathcal{L}_j(\hat{\beta}_t) - \nabla \mathcal{L}_1(\hat{\beta}_t), \beta^* \right\rangle \\
 &= \left\langle \nabla \mathcal{L}_1(\beta^*) + \frac{1}{m} \sum_{j \in [m]} \nabla \mathcal{L}_j(\hat{\beta}_t) - \nabla \mathcal{L}_1(\hat{\beta}_t), \hat{\beta}_{t+1} - \beta^* \right\rangle \\
 &\quad + \kappa \|\hat{\beta}_{t+1} - \beta^*\|_2^2 \\
 &= \langle \nabla \tilde{\mathcal{L}}_1(\beta^*, \hat{\beta}_t), \hat{\beta}_{t+1} - \beta^* \rangle + \kappa \|\hat{\beta}_{t+1} - \beta^*\|_2^2,
 \end{aligned}$$

where the first inequality we use the restricted strong convexity condition (5). Also by the optimality of  $\hat{\beta}_{t+1}$  for (4), we have

$$\tilde{\mathcal{L}}_1(\hat{\beta}_{t+1}, \hat{\beta}_t) - \tilde{\mathcal{L}}_1(\beta^*, \hat{\beta}_t) + \lambda_{t+1} \|\hat{\beta}_{t+1}\|_1 - \lambda_{t+1} \|\beta^*\|_1 \leq 0.$$

Combining above two inequalities we obtain with probability at least  $1 - \delta$ :

$$\begin{aligned}
 \lambda_{t+1} \|\beta^*\|_1 - \lambda_{t+1} \|\hat{\beta}_{t+1}\|_1 &\geq \langle \nabla \tilde{\mathcal{L}}_1(\beta^*, \hat{\beta}_t), \hat{\beta}_{t+1} - \beta^* \rangle + \kappa \|\hat{\beta}_{t+1} - \beta^*\|_2^2 \\
 &\geq -\|\nabla \tilde{\mathcal{L}}_1(\beta^*, \hat{\beta}_t)\|_\infty \|\hat{\beta}_{t+1} - \beta^*\|_1 + \kappa \|\hat{\beta}_{t+1} - \beta^*\|_2^2 \\
 &\geq -\frac{\lambda_{t+1}}{2} \|\hat{\beta}_{t+1} - \beta^*\|_1 + \kappa \|\hat{\beta}_{t+1} - \beta^*\|_2^2.
 \end{aligned}$$

By triangle inequality that  $\lambda_{t+1} \|\hat{\beta}_{t+1} - \beta^*\|_1 \geq \lambda_{t+1} \|\beta^*\|_1 - \lambda_{t+1} \|\hat{\beta}_{t+1}\|_1$ , we have

$$\begin{aligned}
 \kappa \|\hat{\beta}_{t+1} - \beta^*\|_2^2 &\leq \frac{3\lambda_{t+1}}{2} \|\hat{\beta}_{t+1} - \beta^*\|_1 \\
 &= \frac{3\lambda_{t+1}}{2} (\|(\hat{\beta}_{t+1} - \beta^*)_S\|_1 + \|(\hat{\beta}_{t+1} - \beta^*)_{S^c}\|_1) \\
 &\leq \frac{3\lambda_{t+1}}{2} (\|(\hat{\beta}_{t+1} - \beta^*)_S\|_1 + 3\|(\hat{\beta}_{t+1} - \beta^*)_S\|_1) \\
 &= 6\lambda_{t+1} \|(\hat{\beta}_{t+1} - \beta^*)_S\|_1 \\
 &\leq 6\sqrt{s}\lambda_{t+1} \|(\hat{\beta}_{t+1} - \beta^*)_S\|_2 \\
 &\leq 6\sqrt{s}\lambda_{t+1} \|\hat{\beta}_{t+1} - \beta^*\|_2.
 \end{aligned}$$

We get

$$\|\hat{\beta}_{t+1} - \beta^*\|_2 \leq \frac{6\sqrt{s}\lambda_{t+1}}{\kappa}.$$

Substitute  $\lambda_{t+1}$  in (9) concludes the proof for  $\ell_2$  estimation error bound. For  $\|\widehat{\beta}_{t+1} - \beta^*\|_1$ , we know

$$\begin{aligned} \|\widehat{\beta}_{t+1} - \beta^*\|_1 &\leq \|(\widehat{\beta}_{t+1} - \beta^*)_S\|_1 + \|(\widehat{\beta}_{t+1} - \beta^*)_{S^c}\|_1 \\ &\leq 4\|(\widehat{\beta}_{t+1} - \beta^*)_S\|_1 \leq 4\sqrt{s}\|(\widehat{\beta}_{t+1} - \beta^*)_S\|_2 \\ &\leq 4\sqrt{s}\|\widehat{\beta}_{t+1} - \beta^*\|_2 \leq \frac{24s\lambda_{t+1}}{\kappa}, \end{aligned}$$

which obtains the desired bound.  $\square$

#### B.4. Proof of Theorem 3

*Proof.* Theorem 3 follows from Theorem 6 after we verify some conditions. First, it is easy to see that the quadratic loss  $L = 1, M = 0$ . Under conditions of Theorem, with probability  $1 - \delta$ ,

$$\left\| \frac{1}{m} \sum_{j \in [m]} \nabla \mathcal{L}_j(\beta^*) \right\|_{\infty} \lesssim \sigma \sigma_X \sqrt{\frac{\log(p/\delta)}{mn}}.$$

This follows from Corollary 5.17 of [Vershynin \(2012\)](#). Furthermore, with probability at least  $1 - \delta$ , we have

$$\max_{j \in [m], i \in [n]} \|\mathbf{x}_{ji}\|_{\infty} \lesssim \sigma_X \sqrt{\log(mnp/\delta)}.$$

Finally,

$$\|\widehat{\beta}_0 - \beta^*\|_1 \lesssim \frac{s\sigma\sigma_X}{\kappa} \sqrt{\frac{\log(np/\delta)}{n}},$$

with probability at least  $1 - \delta$  ([Wainwright, 2009](#), [Meinshausen & Yu, 2009](#), [Bickel et al., 2009](#)). Plugging these bounds into Theorem 6 completes the proof.  $\square$

#### B.5. Proof of Corollary 7

*Proof.* The proof proceeds by recursively applying Theorem 6 and sum a geometric sequence. For notation simplicity let

$$\begin{aligned} a &= \frac{48s}{\kappa} \left\| \frac{1}{m} \sum_{j \in [m]} \nabla \mathcal{L}_j(\beta^*) \right\|_{\infty}, \\ b &= \left( \frac{48sL}{\kappa} \left( \max_{j,i} \|\mathbf{x}_{ji}\|_{\infty}^2 \right) \sqrt{\frac{4\log(2p/\delta)}{n}} \right), \\ c &= \frac{48sM}{\kappa} \left( \max_{j,i} \|\mathbf{x}_{ji}\|_{\infty}^3 \right). \end{aligned}$$

By Theorem 6 we have

$$\begin{aligned} \|\widehat{\beta}_{t+1} - \beta^*\|_1 &\leq a + b\|\widehat{\beta}_t - \beta^*\|_1 + c\|\widehat{\beta}_t - \beta^*\|_1^2 \\ &\leq a + 2b\|\widehat{\beta}_t - \beta^*\|_1 \\ &\leq a + 2b(a + 2b\|\widehat{\beta}_{t-1} - \beta^*\|_1) \leq \dots \\ &\leq a \sum_{k=0}^t (2b)^k + (2b)^{t+1} \|\widehat{\beta}_0 - \beta^*\|_1. \\ &= \frac{a(1 - (2b)^{t+1})}{1 - 2b} + (2b)^{t+1} \|\widehat{\beta}_0 - \beta^*\|_1, \end{aligned} \tag{16}$$

which completes the  $\ell_1$  estimation error bound. For  $\|\widehat{\beta}_{t+1} - \beta^*\|_2$ , we first use (16) to obtain

$$\|\widehat{\beta}_t - \beta^*\|_1 \leq \frac{a(1 - (2b)^t)}{1 - (2b)} + (2b)^t \|\widehat{\beta}_0 - \beta^*\|_1.$$

Then apply Theorem 6 to obtain that

$$\begin{aligned} \|\widehat{\boldsymbol{\beta}}_{t+1} - \boldsymbol{\beta}^*\|_2 &\leq \frac{a}{4\sqrt{s}} + \frac{(2b)}{4\sqrt{s}} \|\widehat{\boldsymbol{\beta}}_t - \boldsymbol{\beta}^*\|_1 \leq \frac{a}{4\sqrt{s}} + \frac{b}{4\sqrt{s}} \left( \frac{a(1-(2b)^t)}{1-(2b)} + (2b)^t \|\widehat{\boldsymbol{\beta}}_0 - \boldsymbol{\beta}^*\|_1 \right) \\ &= \frac{1}{4\sqrt{s}} \left( a + \frac{a((2b) - (2b)^{t+1})}{1-(2b)} \right) + \frac{(2b)^{t+1} \|\widehat{\boldsymbol{\beta}}_0 - \boldsymbol{\beta}^*\|_1}{4\sqrt{s}} \\ &= \frac{a(1-(2b)^{t+1})}{4\sqrt{s}(1-(2b))} + \frac{(2b)^{t+1} \|\widehat{\boldsymbol{\beta}}_0 - \boldsymbol{\beta}^*\|_1}{4\sqrt{s}}, \end{aligned}$$

which concludes the proof.  $\square$

## B.6. Proof of Lemma 10

*Proof.* By the definition of  $\mathcal{L}_j(\boldsymbol{\beta})$ , we have

$$\frac{1}{m} \sum_{j \in [m]} \nabla \mathcal{L}_j(\boldsymbol{\beta}^*) = \frac{1}{mn} \sum_{j \in [m]} \sum_{i \in [n]} \mathbf{x}_{ji} \left( y_{ji} - \frac{y_{ji}}{1 + \exp(-y_{ji} \langle \boldsymbol{\beta}, \mathbf{x}_{ji} \rangle)} \right).$$

It is easy to check that

$$\mathbb{E} \left[ y_{ji} - \frac{y_{ji}}{1 + \exp(-y_{ji} \langle \boldsymbol{\beta}, \mathbf{x}_{ji} \rangle)} \right] = 0, \quad \text{and} \quad \left| y_{ji} - \frac{y_{ji}}{1 + \exp(-y_{ji} \langle \boldsymbol{\beta}, \mathbf{x}_{ji} \rangle)} \right| \leq 1$$

and thus

$$\begin{aligned} \mathbb{E} \left[ \mathbf{x}_{ji} \left( y_{ji} - \frac{y_{ji}}{1 + \exp(-y_{ji} \langle \boldsymbol{\beta}, \mathbf{x}_{ji} \rangle)} \right) \right] &= 0, \\ \left\| \mathbf{x}_{ji} \left( y_{ji} - \frac{y_{ji}}{1 + \exp(-y_{ji} \langle \boldsymbol{\beta}, \mathbf{x}_{ji} \rangle)} \right) \right\|_{\infty} &\leq \max_{j^i} (\|\mathbf{x}_{j^i}\|_{\infty}). \end{aligned}$$

Applying Azuma-Hoeffding inequality (Hoeffding, 1963) and the union bound over  $[p]$  leads to the desired bound.  $\square$

## C. Full Experimental Results

We run the algorithms for both distributed regression and classification problems. The algorithms to be compared are:

- **Local:** the first machine just solves a related  $\ell_1$  regularized problem (lasso or  $\ell_1$  regularized logistic regression) with the optimal  $\lambda$ , and outputs the solution. Obviously this approach is communication free.
- **Centralize:** the master gathers all data from different machines together, and solves a centralized  $\ell_1$  regularized loss minimization problem with the optimal  $\lambda$ , and outputs the solution. This approach is communication expensive as all data needs to be communicated, but it usually gives us the best estimation and prediction performance.
- **Prox GD:** the distributed proximal gradient descent is ran on the  $\ell_1$  regularized objective, where we initialized the starting point with the first machine's solution.
- **Avg-Debias:** the method proposed in Lee et al. (2015b), with fine tuned regularization and hard thresholding parameters. This approach only requires one round of communication, where each machine sends a  $p$ -dimensional vector. However, Avg-Debias is computationally prohibitive because of the debiasing operation.
- **EDSL:** the proposed efficient distributed sparse learning approach, where the regularization level at each iteration is fine tuned on a held out test data set.

### C.1. Simulations

The full experimental results plotted in Figure 3 and Figure 4, with various settings of  $(n, p, m, s)$ , and condition numbers  $1/\kappa$ . We have the following observations:

Table 2. List of real-world datasets used in the experiments.

| Name         | #Instances | #Features | Task           |
|--------------|------------|-----------|----------------|
| a9a          | 48,842     | 123       | Classification |
| connect-4    | 67,557     | 127       | Regression     |
| dna          | 2,000      | 181       | Regression     |
| mitface      | 6,977      | 362       | Classification |
| mnist 1 vs 2 | 14,867     | 785       | Classification |
| mnist        | 60,000     | 785       | Regression     |
| mushrooms    | 8,124      | 113       | Classification |
| protein      | 17,766     | 358       | Regression     |
| spambase     | 4,601      | 57        | Classification |
| usps         | 7,291      | 257       | Regression     |
| w8a          | 64,700     | 301       | Classification |
| year         | 51,630     | 91        | Regression     |

- The Avg-Debias approach obtained much better estimation error compared to Local after one round of communication and sometimes performed quite close to Centralize. However, in most cases, there is still a gap compared with Centralize, especially when the problem is not well-conditioned or the number of machines  $m$  is large.
- When the problem is well conditioned ( $\Sigma_{ij} = 0.5^{|i-j|}$  case), Prox GD converges reasonably fast. However, it becomes very slow when the condition number becomes bad ( $\Sigma_{ij} = 0.5^{|i-j|/5}$  case). We expect to observe a similar phenomenon for other first-order distributed optimization algorithms, such as accelerated proximal gradient or ADMM.
- As theory suggests, EDSL obtained a solution that is competitive with Avg-Debias after one round of communication. The estimation error decreases to match performance of Centralize within few rounds of communications; typically less than 5, even though the theory suggests EDSL will match the performance of centralize within  $\mathcal{O}(\log m)$  rounds of communication.

## C.2. Real-world Data Evaluation

In real world data evaluation presented in Section 5.2, the datasets are publicly available from the LIBSVM website<sup>7</sup> and UCI Machine Learning Repository<sup>8</sup>. The statistics of these datasets are summarized in Table 2, where some of the multi-class classification datasets are adopted under the regression setting with squared losses. The results are plotted in Figure 5 where for some datasets the performance of Avg-Debias is significantly worse than others (mostly because the debiasing step fails), thus we omit these plots. The plots are shown in Figure 5 We have the following observations

- Since there is no well-specified model on these datasets, the curves behave quite differently on different data sets. However, a large gap between the local and centralized procedure is consistent as the later uses 10 times more data.
- Avg-Debias often fails on these real datasets and performs much worse than in simulations. The main reason might be that the assumptions, such as well-specified model or generalized coherence condition, fail, then Avg-Debias can totally fail and produce solution even much worse than the local.
- Prox GD approach still converges slowly in most of the cases.
- The proposed EDSL is quite robust on real world data sets, and can output a solution which is highly competitive with the centralized model within a few rounds of communications.
- There exists a slight “zig-zag” behavior for EDSL approach on some data sets. For example, on the mushrooms data set, the predictive performance of EDSL is not stable.

<sup>7</sup><https://www.csie.ntu.edu.tw/~cjlin/libsvmtools/datasets/>

<sup>8</sup><http://archive.ics.uci.edu/ml/>

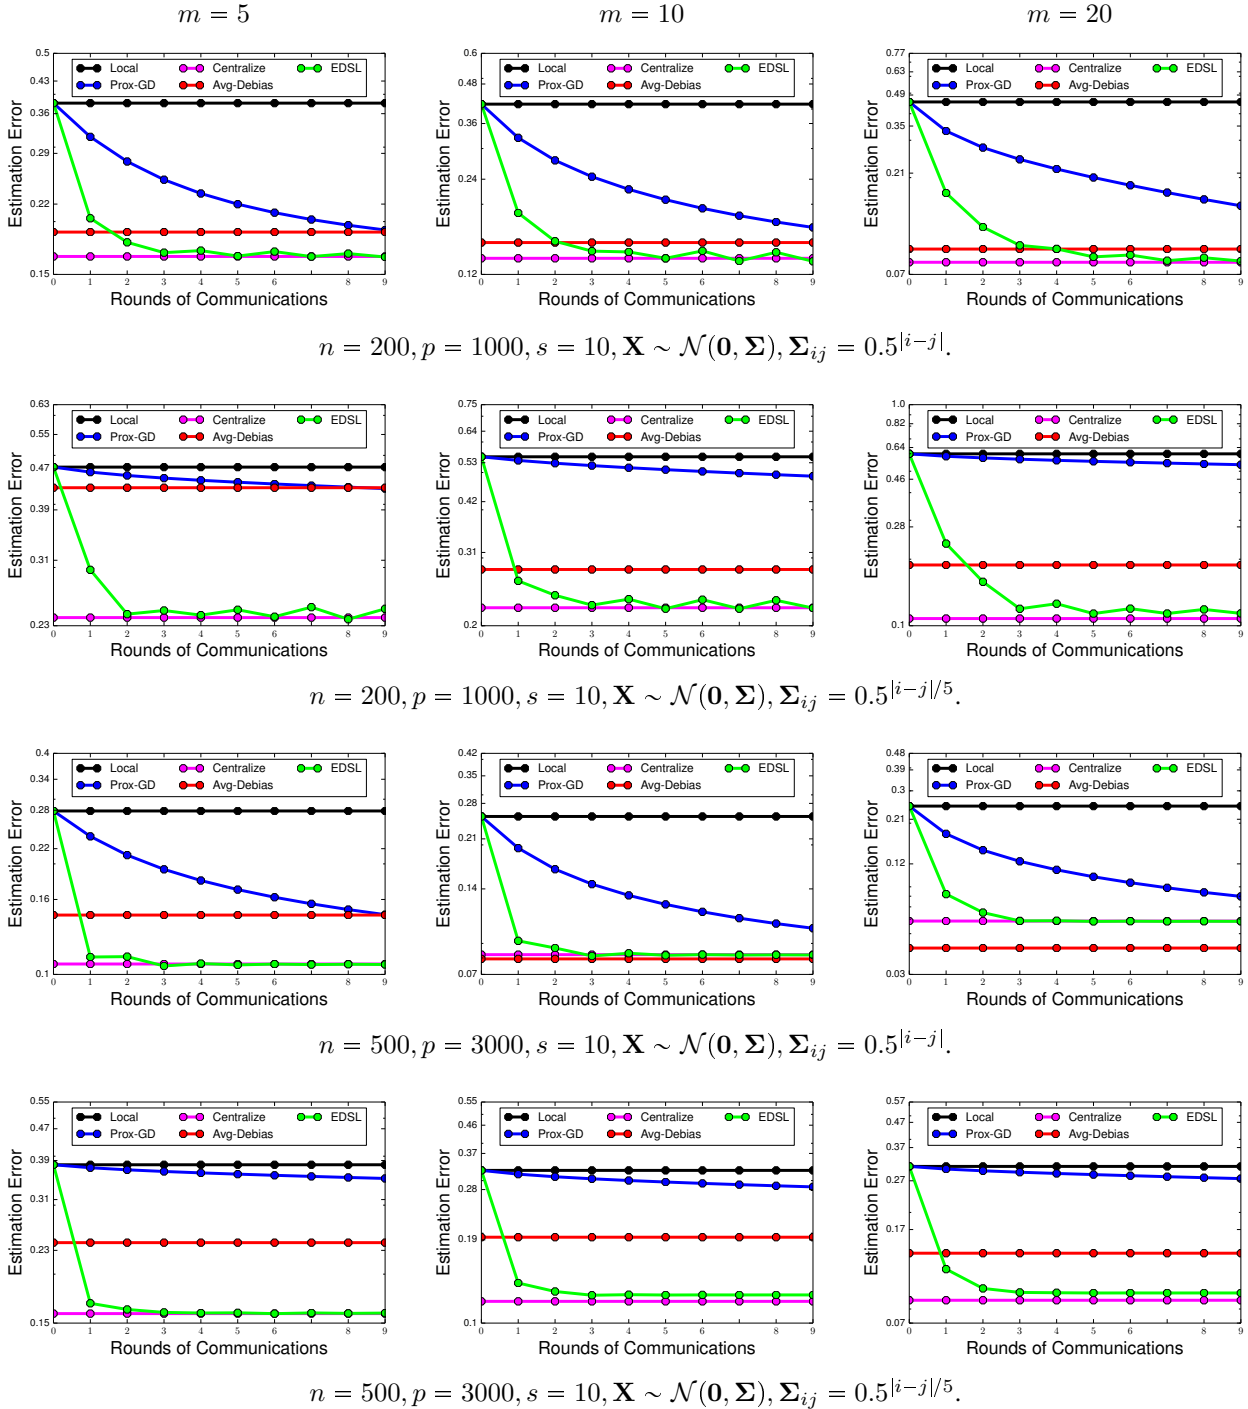

Figure 3. Comparison of various algorithms for distributed sparse regression, 1st and 3rd row: well-conditioned cases, 2nd and 4th row: ill-conditioned cases.



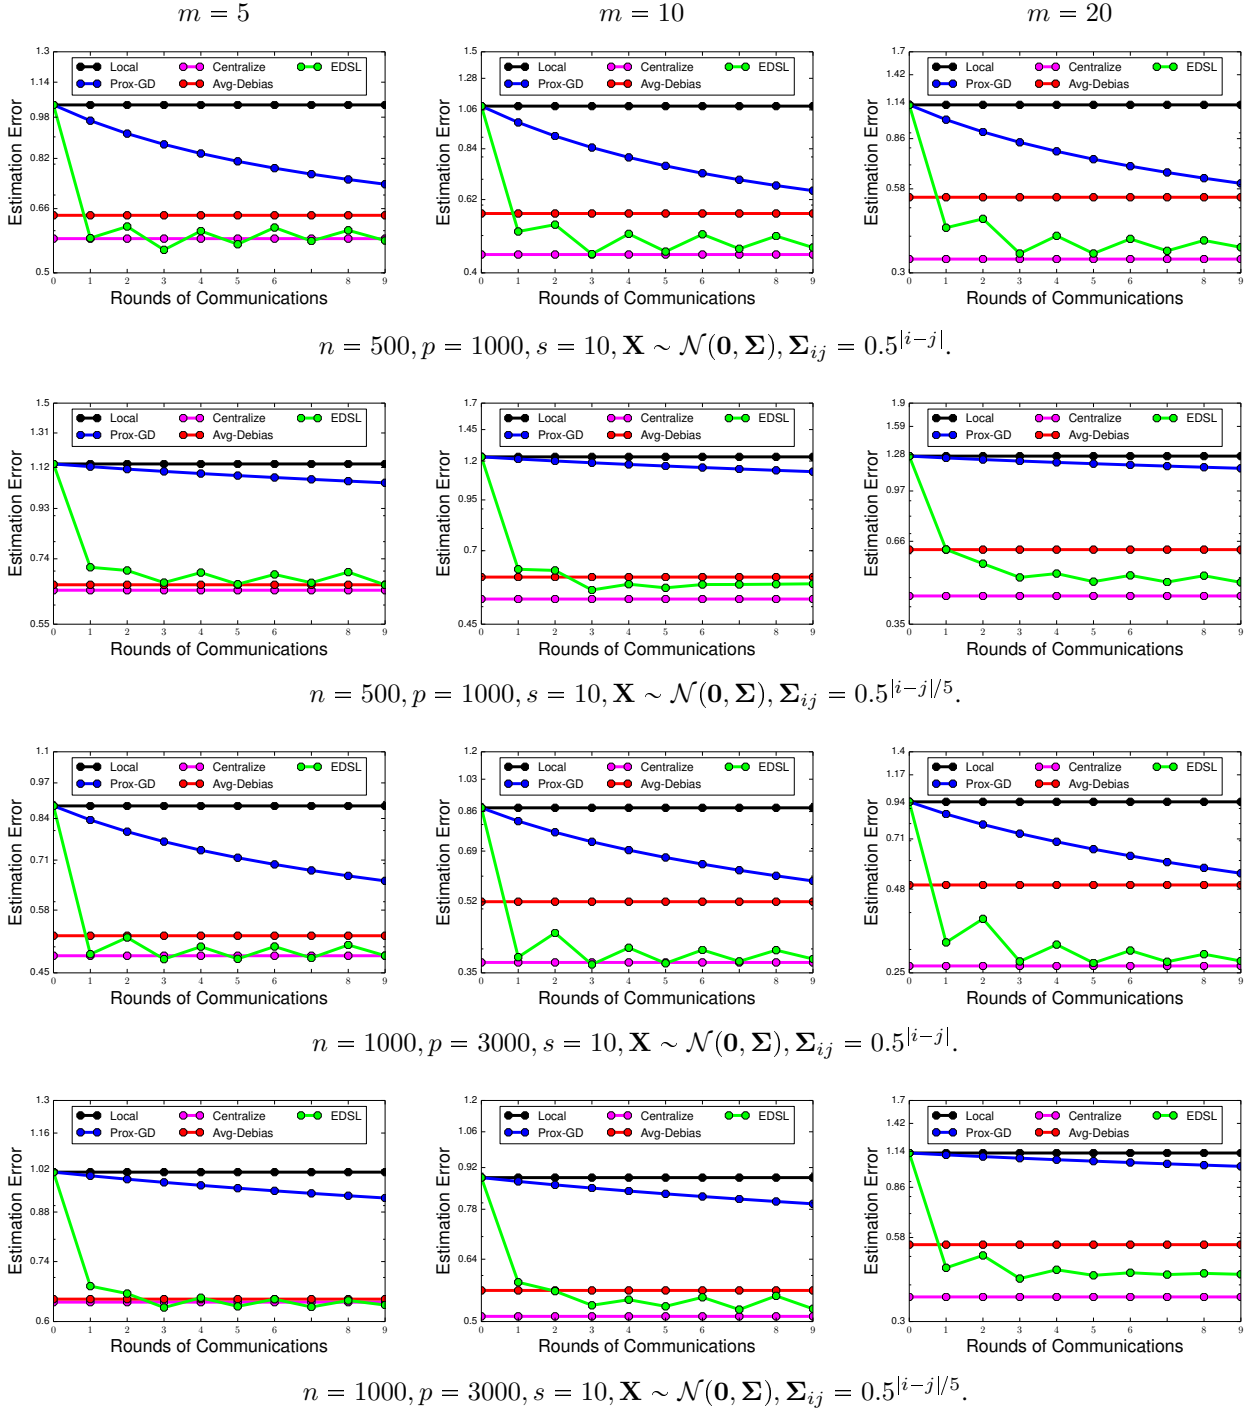

Figure 4. Comparison of various algorithms for distributed sparse classification (logistic regression), 1st and 3rd row: well-conditioned cases, 2nd and 4th row: ill-conditioned cases.

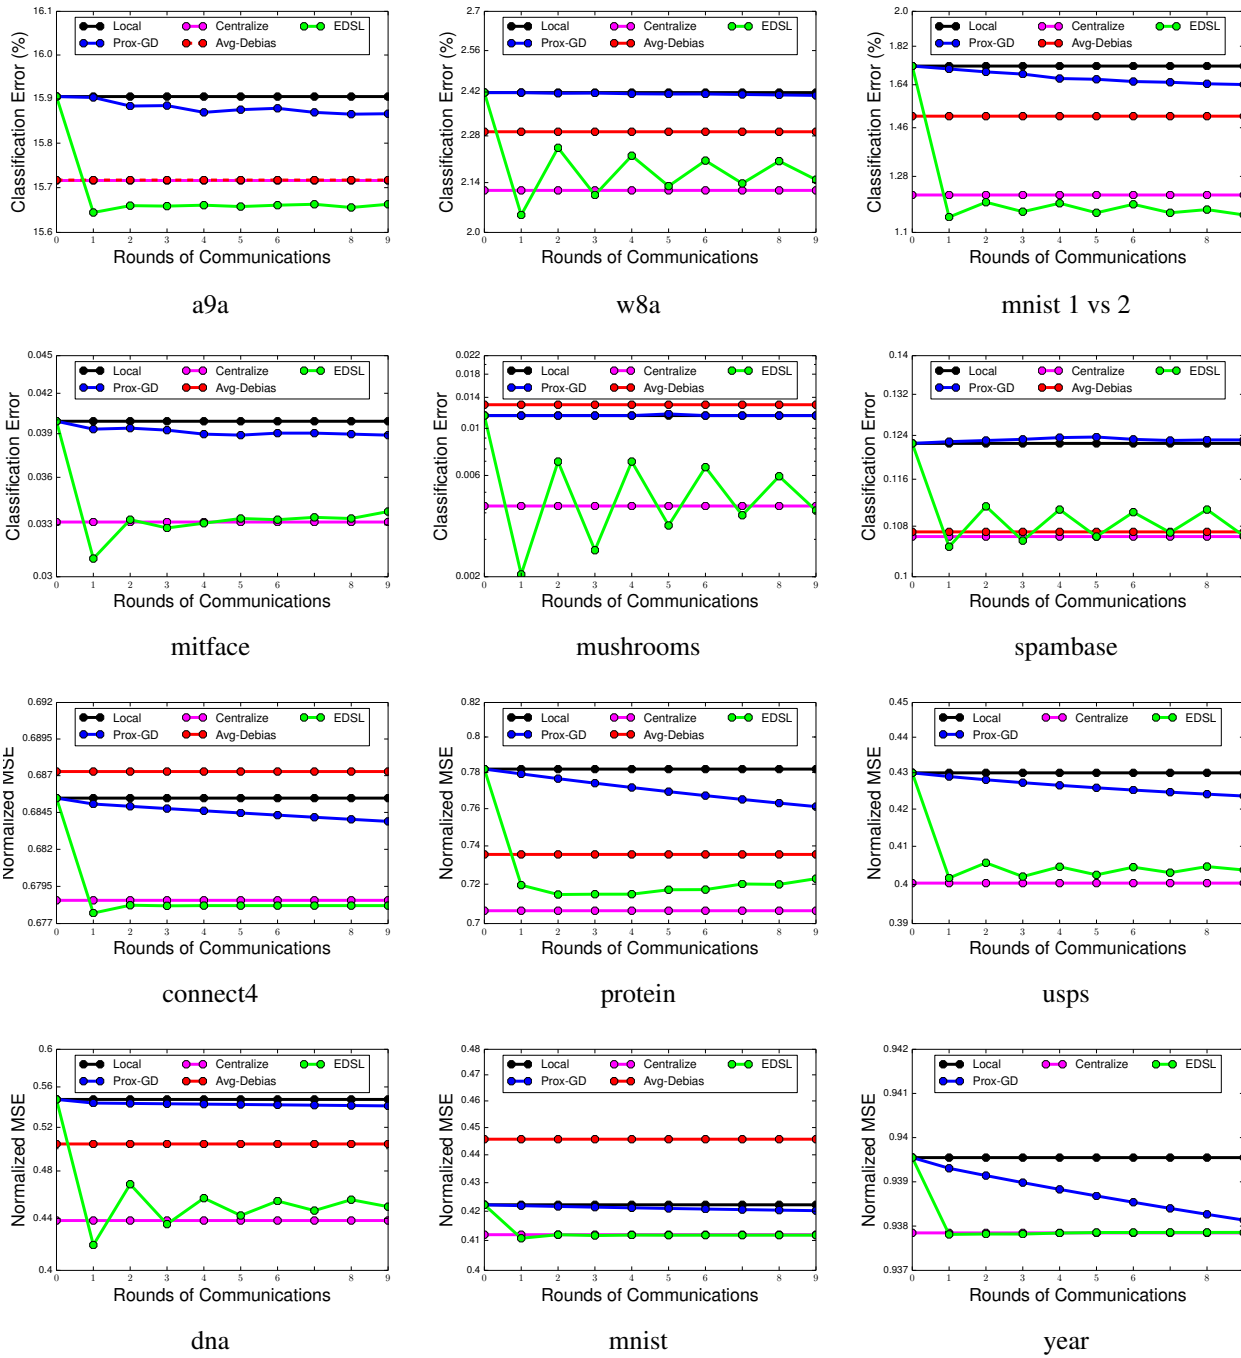

Figure 5. Comparison of various approaches for distributed sparse regression and classification on real world datasets. (Avg-Debias is omitted when it is significantly worse than others.)
